# Supplementary material for: Plant-Based Foods and Vascular Function: A Systematic Review of Dietary Intervention Trials in Older Subjects and Hypothesized Mechanisms of Action
Source: MDPI journal article supplement (doi:10.3390/nu14132615), 2022-06-24

# Supplementary Materials

**Figure S1.** Risk of bias for each item assessed in each of the included studies.

|                                 | (1) random sequence generation | (2) allocation concealment | (3) blinding of participants and personnel | (4) blinding of outcome assessment | (5) incomplete outcome data | (6) selective reporting data | (7) other bias |
|---------------------------------|--------------------------------|----------------------------|--------------------------------------------|------------------------------------|-----------------------------|------------------------------|----------------|
| Casey et al., 2015              | ?                              | ?                          | ?                                          | -                                  | +                           | -                            | ?              |
| Dodd et al., 2019               | ?                              | ?                          | +                                          | ?                                  | +                           | -                            | ?              |
| Hughes et al., 2016             | ?                              | ?                          | ?                                          | -                                  | -                           | ?                            | ?              |
| Hughes et al., 2020             | ?                              | ?                          | +                                          | ?                                  | +                           | ?                            | ?              |
| Pekas et al., 2021              | ?                              | ?                          | +                                          | +                                  | +                           | -                            | ?              |
| Viera de Oliveira et al., 2016  | ?                              | ?                          | +                                          | +                                  | +                           | ?                            | ?              |
| Amante de Oliveira et al., 2017 | ?                              | ?                          | +                                          | +                                  | +                           | ?                            | ?              |
| Casey & Bock 2021               | ?                              | ?                          | +                                          | ?                                  | +                           | ?                            | ?              |
| do Rosario et al., 2020         | +                              | +                          | +                                          | ?                                  | +                           | ?                            | ?              |
| Gilchrist et al. 2013           | ?                              | ?                          | +                                          | ?                                  | +                           | ?                            | ?              |
| Jones et al. 2019               | -                              | -                          | +                                          | +                                  | +                           | ?                            | ?              |
| Oggioni et al., 2017            | ?                              | ?                          | +                                          | ?                                  | +                           | ?                            | ?              |
| Shaltout et al., 2017           | +                              | ?                          | +                                          | +                                  | +                           | ?                            | ?              |
| Woessner et al., 2018           | ?                              | ?                          | +                                          | ?                                  | +                           | ?                            | ?              |
| do Rosario et al., 2020         | +                              | +                          | +                                          | +                                  | +                           | ?                            | ?              |

**Figure S2.** Risk of bias for each item assessed, presented as a percentage across all included studies combined.

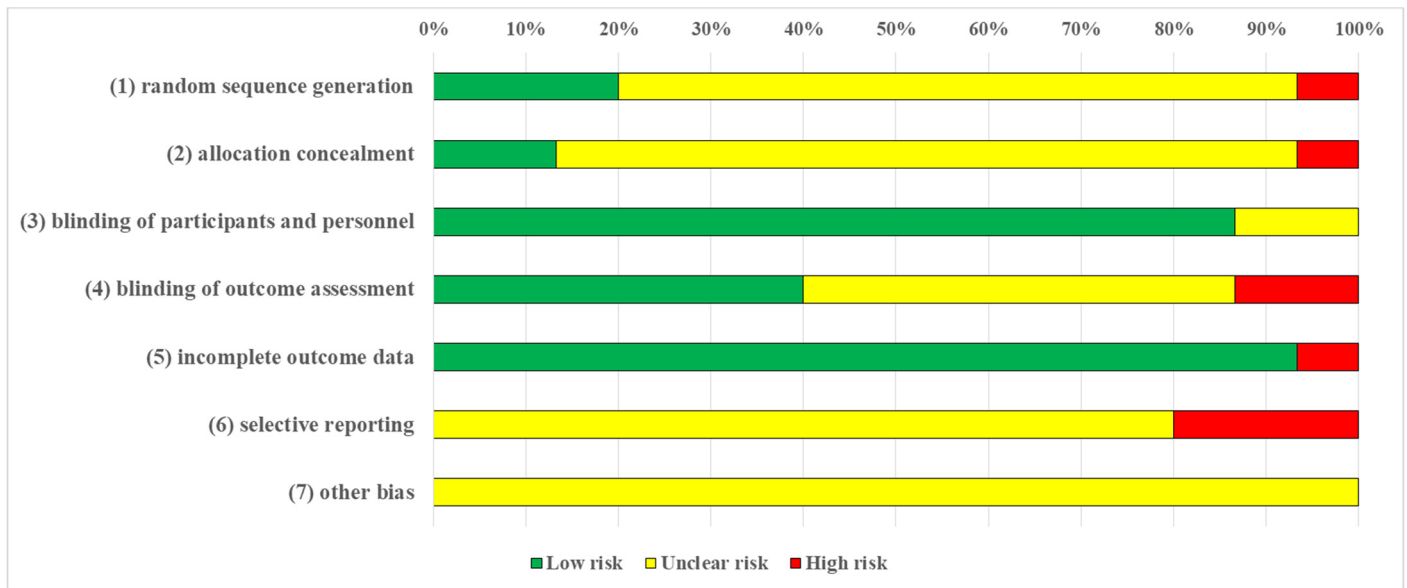

Supplement: s1 [file s1]
